# Supplementary material
Source: PubMed Central journal article supplement (PMC2805828)
Supplement: NIHMS33275-supplement-supp_data.pdf [file NIHMS33275-supplement-supp_data.pdf]

Sequential Learning of Pheromonal Cues Modulates Memory Consolidation in Trainer-Specific Associative Courtship Conditioning

Aki Ejima, Benjamin P.C. Smith, Christophe Lucas, Joel D. Levine, and Leslie C. Griffith

Supplemental References

S1. Lucas, C., Pho, D.B., Fresneau, D., and Jallon, J.M. (2004). Hydrocarbon circulation and colonial signature in *Pachycondyla villosa*. *J. Insect Physiol.* 50, 595–607.

S2. Antony, C., and Jallon, J.-M. (1982). The chemical basis for sex recognition in *Drosophila melanogaster*. *J. Insect Physiol.* 28, 873–880.

S3. Pechine, J.M., and Jallon, J.-M. (1988). Precise characterization of cuticular compounds in young *Drosophila* by mass spectrometry. *J. Chem. Ecol.* 14, 1071–1085.

S4. McCarthy, E.D., Han, J., and Calvin, M. (1968). Hydrogen atom transfer in mass spectrometric fragmentation patterns of saturated aliphatic hydrocarbons. *Anal. Chem.* 40, 1475–1480.

S5. Nelson, D.R. (1978). Long-chain methyl-branched hydrocarbons: occurrence, biosynthesis and function. *Advances Insect Physiol.* 13, 1–33.

S6. Nelson, D.R., Sukkestad, D.R., and Zaylskie, R.G. (1972). Mass spectra of methyl-branched hydrocarbons from eggs of the tobacco hornworm. *J. Lipid Res.* 13, 413–421.

S7. Pomonis, J.G., Fatland, C.L., Nelson, D.R., and Zaylskie, R.G. (1978). Insect hydrocarbons. Corroboration of structure by synthesis and mass spectrometry of mono- and dimethylalkanes. *J. Chem. Ecol.* 4.

S8. Pechine, J.M., Perez, F., Antony, C., and Jallon, J.M. (1985). A further characterization of *Drosophila* cuticular monoenes using a mass spectrometry method to localize double bonds in complex mixtures. *Anal. Biochem.* 145, 177–182.

Table S1. Cuticular Hydrocarbons of Mature and Immature Virgins

| Compound    | Peak | Source | Time  | Immature Virgin (iV) |       |         | Mature Virgin (mV) |       |         |
|-------------|------|--------|-------|----------------------|-------|---------|--------------------|-------|---------|
|             |      |        |       | Mean Amount (Area)   | SEM   | Percent | Mean Amount (Area) | SEM   | Percent |
| nC19        | 1    | both   | 17.42 | 0.278                | 0.107 | 0.924   | 0.362              | 0.064 | 0.573   |
| uic         | 2    | both   | 18.00 | 0.237                | 0.088 | 0.786   | 0.169              | 0.030 | 0.268   |
| nC21        | 3    | both   | 22.07 | 0.041                | 0.016 | 0.135   | 0.123              | 0.014 | 0.195   |
| uic         | 4    | both   | 22.31 | 0.043                | 0.023 | 0.143   | tr                 |       |         |
| Xi-nC20:1   | 5    | both   | 23.08 | tr                   |       |         | tr                 |       |         |
| nC22        | 6    | both   | 24.64 | tr                   |       |         | 0.076              | 0.005 | 0.121   |
| 7,11-nC23:2 | 7    | mV     | 25.87 | nd                   |       |         | 0.127              | 0.005 | 0.202   |
| 2-MeC22     | 8    | mV     | 26.27 | nd                   |       |         | 0.101              | 0.006 | 0.160   |
| 9-nC23:1    | 9    | both   | 26.34 | tr                   |       |         | 0.105              | 0.005 | 0.166   |
| 7-nC23:1    | 10   | both   | 26.54 | 0.065                | 0.046 | 0.214   | 0.680              | 0.030 | 1.077   |
| 6-nC23:1    | 11   | mV     | 26.67 | nd                   |       |         | 0.076              | 0.002 | 0.120   |
| 5-nC23:1    | 12   | both   | 26.82 | tr                   |       |         | tr                 |       |         |
| nC23        | 13   | both   | 27.19 | 0.034                | 0.022 | 0.114   | 2.241              | 0.100 | 3.549   |
| 9-nC24:1    | 14   | mV     | 28.85 | nd                   |       |         | tr                 |       |         |
| 7-nC24:1    | 15   | mV     | 28.94 | nd                   |       |         | tr                 |       |         |
| 5-nC24:1    | 16   | both   | 29.04 | tr                   |       |         | tr                 |       |         |
| nC24        | 17   | both   | 29.66 | tr                   |       |         | 0.186              | 0.006 | 0.295   |
| 9,13-nC25:2 | 18   | both   | 30.67 | tr                   |       |         | 0.116              | 0.007 | 0.184   |
| 7,11-nC25:2 | 19   | both   | 30.86 | tr                   |       |         | 0.457              | 0.020 | 0.724   |
| 2-MeC24     | 20   | mV     | 31.21 | nd                   |       |         | 0.116              | 0.116 | 0.184   |
| 9-nC25:1    | 21   | both   | 31.33 | 0.060                | 0.046 | 0.199   | 2.334              | 0.140 | 3.697   |
| 7-nC25:1    | 22   | both   | 31.52 | 0.080                | 0.063 | 0.267   | 1.526              | 0.061 | 2.417   |
| 5-nC25:1    | 23   | both   | 31.78 | tr                   |       |         | 0.143              | 0.016 | 0.226   |

(continued)

Table S1. Continued

| Compound     | Peak | Source | Time  | Immature Virgin (iV) |       |         | Mature Virgin (mV) |       |         |
|--------------|------|--------|-------|----------------------|-------|---------|--------------------|-------|---------|
|              |      |        |       | Mean Amount (Area)   | SEM   | Percent | Mean Amount (Area) | SEM   | Percent |
| nC25         | 24   | both   | 32.12 | 0.034                | 0.024 | 0.112   | 2.888              | 0.104 | 4.573   |
| uic          | 25   | both   | 32.90 | 0.286                | 0.193 | 0.948   | tr                 |       |         |
| 7,11-nC26:2  | 26   | both   | 33.27 | 0.294                | 0.197 | 0.975   | 0.116              | 0.004 | 0.184   |
| 2-MeC25      | 27   | both   | 33.60 | tr                   |       |         | 0.131              | 0.003 | 0.207   |
| 9-nC26:1     | 28   | mV     | 33.70 | nd                   |       |         | tr                 |       |         |
| 7-nC26:1     | 29   | both   | 33.79 | tr                   |       |         | 0.069              | 0.003 | 0.109   |
| 5-nC26:1     | 30   | both   | 33.89 | tr                   |       |         | 0.085              | 0.003 | 0.134   |
| nC26         | 31   | STD    | 34.44 | 1.000                | 0.000 | 3.320   | 1.000              | 0.000 | 1.580   |
| 9,13-nC27:2  | 32   | both   | 35.40 | tr                   |       |         | 0.341              | 0.015 | 0.540   |
| 7,11-nC27:2  | 33   | both   | 35.69 | tr                   |       |         | 8.628              | 0.274 | 13.664  |
| 2-MeC26      | 34   | both   | 35.91 | 0.392                | 0.042 | 1.304   | 7.883              | 0.210 | 12.484  |
| 9-nC27:1     | 35   | both   | 36.09 | 0.044                | 0.030 | 0.146   | 2.310              | 0.091 | 3.658   |
| 7-nC27:1     | 36   | both   | 36.21 | 0.124                | 0.069 | 0.412   | 3.998              | 0.147 | 6.332   |
| 5-nC27:1     | 37   | both   | 36.48 | tr                   |       |         | 0.283              | 0.007 | 0.448   |
| nC27         | 38   | both   | 36.72 | 0.069                | 0.021 | 0.229   | 3.119              | 0.036 | 4.940   |
| 8,12-nC28:2  | 39   | both   | 37.78 | tr                   |       |         | 0.077              | 0.007 | 0.123   |
| 7,11-nC28:2  | 40   | both   | 37.90 | tr                   |       |         | 0.408              | 0.013 | 0.646   |
| 2-MeC27      | 41   | mV     | 38.01 | nd                   |       |         | 0.060              | 0.002 | 0.100   |
| 6,10-nC28:2  | 42   | both   | 38.15 | 0.084                | 0.011 | 0.277   | 0.116              | 0.003 | 0.184   |
| uic          | 43   | both   | 38.58 | 0.052                | 0.035 | 0.173   | tr                 |       |         |
| nC28         | 44   | both   | 38.94 | 0.033                | 0.002 | 0.111   | 0.093              | 0.005 | 0.148   |
| 9,13-nC29:2  | 45   | mV     | 39.90 | nd                   |       |         | 0.328              | 0.042 | 0.519   |
| 7,11-nC29:2  | 46   | both   | 40.23 | tr                   |       |         | 13.987             | 0.326 | 22.151  |
| 2-MeC28      | 47   | both   | 40.37 | 5.073                | 0.484 | 16.846  | 4.839              | 0.121 | 7.663   |
| 9-nC29:1     | 48   | both   | 40.48 | 0.072                | 0.022 | 0.238   | 0.108              | 0.013 | 0.172   |
| 7-nC29:1     | 49   | both   | 40.66 | 0.868                | 0.142 | 2.881   | 0.483              | 0.036 | 0.765   |
| 5-nC29:1     | 50   | both   | 40.88 | tr                   |       |         | tr                 |       |         |
| nC29         | 51   | both   | 41.10 | 0.168                | 0.008 | 0.558   | 0.477              | 0.011 | 0.756   |
| uic          | 52   | both   | 41.78 | 0.126                | 0.008 | 0.419   | 0.019              | 0.005 | 0.031   |
| uic          | 53   | iV     | 41.89 | 0.040                | 0.016 | 0.132   | nd                 |       |         |
| uic          | 54   | both   | 41.99 | 0.158                | 0.026 | 0.526   | 0.071              | 0.004 | 0.113   |
| uic          | 55   | both   | 42.44 | 0.160                | 0.012 | 0.532   | tr                 |       |         |
| uic          | 56   | both   | 42.67 | 0.312                | 0.064 | 1.037   | tr                 |       |         |
| uic          | 57   | iV     | 42.87 | 0.029                | 0.005 | 0.100   | nd                 |       |         |
| nC30         | 58   | both   | 43.18 | tr                   |       |         | tr                 |       |         |
| uic          | 59   | both   | 43.87 | 0.042                | 0.042 | 0.138   | tr                 |       |         |
| 9,13-nC31:2  | 60   | both   | 44.00 | 0.699                | 0.064 | 2.321   | 0.110              | 0.020 | 0.174   |
| uic          | 61   | both   | 44.16 | 0.125                | 0.011 | 0.414   | 0.066              | 0.008 | 0.105   |
| 7,11-nC31:2  | 62   | mV     | 44.33 | nd                   |       |         | 0.673              | 0.023 | 1.065   |
| 2-MeC30      | 63   | both   | 44.52 | 4.905                | 0.275 | 16.287  | 1.044              | 0.067 | 1.653   |
| 9-nC31:1     | 64   | both   |       | tr                   |       |         | tr                 |       |         |
| 7-nC31:1     | 65   | both   | 44.67 | 1.365                | 0.253 | 4.534   | 0.097              | 0.016 | 0.153   |
| 5-nC31:1     | 66   | both   | 44.82 | 0.337                | 0.052 | 1.120   | 0.053              | 0.013 | 0.083   |
| nC31         | 67   | both   | 45.21 | 0.219                | 0.010 | 0.728   | 0.068              | 0.008 | 0.108   |
| uic          | 68   | both   | 45.84 | 0.187                | 0.015 | 0.622   | tr                 |       |         |
| uic          | 69   | both   | 45.96 | 0.247                | 0.020 | 0.820   | tr                 |       |         |
| uic          | 70   | iV     | 46.42 | 0.399                | 0.138 | 1.326   | nd                 |       |         |
| uic          | 71   | iV     | 47.53 | 0.035                | 0.035 | 0.115   | nd                 |       |         |
| 11,17-nC33:2 | 72   | both   | 47.53 | 0.104                | 0.054 | 0.345   | tr                 |       |         |
| Xi-nC33:2    | 73   | both   | 47.91 | 4.496                | 0.585 | 14.928  | 0.204              | 0.069 | 0.323   |
| uic          | 74   | iV     | 48.16 | 0.091                | 0.020 | 0.304   | nd                 |       |         |
| Xi-nC33:1    | 75   | both   | 48.38 | 2.716                | 0.338 | 9.018   | 0.146              | 0.040 | 0.232   |
| uic          | 76   | iV     | 48.50 | 0.060                | 0.037 | 0.198   | nd                 |       |         |
| uic          | 77   | both   | 49.09 | 0.141                | 0.068 | 0.469   | tr                 |       |         |
| uic          | 78   | iV     | 49.73 | 0.464                | 0.082 | 1.542   | nd                 |       |         |
| uic          | 79   | iV     | 50.22 | 0.343                | 0.198 | 1.137   | nd                 |       |         |
| uic          | 80   | iV     | 50.36 | 0.148                | 0.099 | 0.491   | nd                 |       |         |
| uic          | 81   | iV     | 51.18 | 0.307                | 0.117 | 1.020   | nd                 |       |         |
| Xi-nC35:2    | 82   | iV     | 51.31 | tr                   |       |         | nd                 |       |         |
| Xi-nC35:2    | 83   | both   | 51.58 | 2.256                | 0.152 | 7.492   | tr                 |       |         |
| Xi-nC35:1    | 84   | both   | 52.14 | 0.577                | 0.062 | 1.917   | tr                 |       |         |
| uic          | 85   | iV     | 53.64 | 0.158                | 0.030 | 0.524   | nd                 |       |         |
| uic          | 86   | both   | 54.19 | 0.068                | 0.023 | 0.226   | tr                 |       |         |

(continued)

Table S1. Continued

Compound Xi: unknown position of double bond(s); uic = unidentified compound (absent from vial control). The peak numbers refer to peaks that showed up in all samples. Other peaks were not included in this analysis. Source indicates which samples included the designated compound: both = present in both; iV = present in immature virgins; mV = present in mature virgins. Mean amount is expressed as peak area counts normalized to the area of the standard (peak 36; nC26 [10 ng]). n = 5 independent samples. nd = not detected (limit of detection 10 pg on-column) tr= trace < 0.1%. Percent refers to the proportion that each compound comprises of the total amount of hydrocarbons extracted.

**Results:** We and others have suggested that although *n*-alkanes and externally branched monomethylalkanes perform a structural function, alkenes act as signals (e.g., [S1]). Consistent with this hypothesis, the proportion of alkanes (externally branched monomethylalkanes + *n*-alkanes) to total hydrocarbons did not significantly differ between immature and mature virgins. No internally branched alkanes were detected in our samples. The proportion of alkenes (monoenes + dienes) did significantly increase with age (immature virgins:  $47.8 \pm 1.7\%$ . Mature virgins:  $61.2 \pm 0.4\%$ ,  $p < 0.01$ ). Although no difference was observed in the proportion of "total" alkanes, the proportion of monomethylalkanes was increased in the immature virgins ( $34.7 \pm 1.3\%$ ) compared to the mature virgins ( $22.5 \pm 0.3\%$ ;  $p < 0.01$ ). The proportion of *n*-alkanes significantly increased in the mature virgins (immature virgins:  $3.0 \pm 0.2\%$ . Mature virgins:  $15.3 \pm 0.3\%$ ,  $p < 0.01$ ). With respect to the alkenes, the proportion of dienes significantly increased in the mature virgins ( $26.5 \pm 1.0\%$  and  $40.8 \pm 0.2\%$ , respectively;  $p < 0.01$ ). The proportion of monoenes did not differ between immature and mature virgins.

**Methods:** Hexane extracts, prepared as described, were reconstituted in 60  $\mu$ l of hexane containing 10 ng/ $\mu$ l hexacosane (nC26) as an injection standard. A 1  $\mu$ l sample of the extract was then injected on a Varian CP3800 gas chromatograph with a flame ionization detector and PTV injector (cool-on-column mode), fitted with 0.25 mm  $\times$  15 m Varian CP8510 fused silica capillary column with a 0.25  $\mu$ m film thickness and a 2.5 m deactivated silica retention gap (Varian, Mississauga, Ontario, Canada). Carrier gas was Helium at a flow rate of 1 ml/min.

Analysis of the extract was carried out with a column temperature profile that began at 50°C (held for 1 min) and was ramped at 15°C/min to 150°C and then at 3°C/min to 280°C, where it was held for 5 min. The injector oven was programmed at 50°C for 0.1 min and then ramped to 280°C at 200°C/min. Varian Star Integrator software was used to calculate the retention time and total area of each peak for subsequent analysis.

Compound identification was conducted on a Shimadzu GC-17A gas chromatograph fitted with a HP-5MS fused silica capillary column (0.25 mm  $\times$  30 m, 0.25  $\mu$ m film thickness) linked to a mass analyzer (Shimadzu QP5050A mass spectrometer). The injector was used in splitless mode with a splitless time of 0.5 min, and the carrier gas was helium at 1 ml/min. Injector temperature was held constant at 280°C. An oven program that began at 60°C (1 min) and was ramped at 6°C/min to 225°C and then 3°C/min to 310°C (10 min) and a pressure program of 57 kPa (1 min) to 185 kPa (1.83 min) at 2 kPa/min were employed. Electron impact positive ions at 70 eV were recorded in the scanning mode (mass range scanned 45–550 amu). The mass spectra were interpreted by fragmentation analysis and comparison to published criteria [S2, S3–S8]. Retention indices, based on a series of *n*-alkane standards (C10–C32; extrapolation to C36), were used to match GC-FID and GC-MS data and to obtain approximate comparisons to published data.

Statistical analysis of the proportion of hydrocarbon types (i.e., straight and branched alkanes and mono- and dienes) was conducted by Steel's 2-tailed Rank Test ( $p \leq 0.01$ ) following Bartlett's F-test for equality of variance with ToxStat v3.4 software (Western Ecosystems Technology Inc., Cheyenne, WY). All calculations were made after removal of the standard area from the data matrix.
